# Supplementary material for: Four New Pterosins from Pteris cretica and Their Cytotoxic Activities
Source: PubMed Central journal article supplement (PMC6696042; doi:10.3390/molecules24152767), 2019-07-30

## SUPPLEMENTAAL MATERIALS

### Four new pterosins from *Pteris cretica* and their cytotoxic activities

Jian Lu, Caiying Peng, Shuang Cheng, Jianqun Liu, Qinge Ma and Jicheng Shu \*

Key Laboratory of Modern Preparation of Traditional Chinese Medicines, Ministry of Education, Jiangxi University of Traditional Chinese Medicine, Nanchang, 330004, China;  
E-Mail: lujian10120801@sina.com

\*Correspondence: 20101042@jxutcm.edu.cn; Tel.: 86-791-7118658.

Received: date; Accepted: date; Published: date

**Abstract:** Phytochemical investigation of the aerial parts of *Pteris cretica* led to isolation and elucidation of nine pterosins, including four new pterosins, creticolacton A (**1**), 13-hydroxyl-2(*R*),3(*R*)-pterosin L (**2**), creticoside A (**3**), spelosin 3-*O*- $\beta$ -D-glucopyranoside (**4**), together with five known pterosins (**5-9**). Their structures were identified mainly on the basis of 1D and 2D NMR spectral data, ESI-MS and literature comparisons. Compounds **1** and **3** were new type of pterosins with a six membered ring between C-14 and C-15 of positions. The new compounds were tested *in vitro* for their cytotoxic activities against four human tumor cell lines (SH-SY5Y, SGC-7901, HCT-116, Lovo). Results showed that compounds **1** and **2** exhibited cytotoxic activity against HCT-116 cells with IC<sub>50</sub> value of 22.4  $\mu$ M and 15.8  $\mu$ M, respectively.

**Keywords:** *Pteris cretica* Linn.; pterosins; Cytotoxic activity.

### Contents of other Supporting Information

#### 1. UV, HRESI-MS, <sup>1</sup>H NMR, <sup>13</sup>C NMR, HSQC, HMBC, NOESY and CD spectra of **1**

[Figure S1 UV spectra of \*\*1\*\*](#)

[Figure S2 HRESIMS spectra of \*\*1\*\*](#)

[Figure S3 <sup>1</sup>H NMR spectra of \*\*1\*\*](#)

[Figure S4 <sup>13</sup>C NMR spectra of \*\*1\*\*](#)

[Figure S5 HSQC spectra of \*\*1\*\*](#)

[Figure S6 HMBC spectra of \*\*1\*\*](#)

**Figure S7 H-H NOESY spectra of 1**

**Figure S8 CD spectra of 1**

**2. UV, HRESI-MS, <sup>1</sup>H NMR, <sup>13</sup>C NMR, HSQC, HMBC, NOESY and CD spectra of 2**

**Figure S9 UV spectra of 2**

**Figure S10 HRESIMS spectra of 2**

**Figure S11 <sup>1</sup>H NMR spectra of 2**

**Figure S12 <sup>13</sup>C NMR spectra of 2**

**Figure S13 HSQC spectra of 2**

**Figure S14 HMBC spectra of 2**

**Figure S15 H-H NOESY spectra of 2**

**Figure S16 CD spectra of 2**

**3. UV, HRESI-MS, <sup>1</sup>H NMR, <sup>13</sup>C NMR, HSQC, HMBC, NOESY and CD spectra of 3**

**Figure S17 UV spectra of 3**

**Figure S18 HRESIMS spectra of 3**

**Figure S19 <sup>1</sup>H NMR spectra of 3**

**Figure S20 <sup>13</sup>C NMR spectra of 3**

**Figure S21 HSQC spectra of 3**

**Figure S22 HMBC spectra of 3**

**Figure S23 H-H NOESY spectra of 3**

**Figure S24 CD spectra of 3**

**4. UV, HRESI-MS, <sup>1</sup>H NMR, <sup>13</sup>C NMR, HSQC, HMBC, NOESY and CD spectra of 4**

**Figure S25 UV spectra of 4**

**Figure S26 HRESIMS spectra of 4**

**Figure S27 <sup>1</sup>H NMR spectra of 4**

**Figure S28 <sup>13</sup>C NMR spectra of 4**

**Figure S29 HSQC spectra of 4**

**Figure S30 HMBC spectra of 4**

**Figure S31 H-H NOESY spectra of 4**

**Figure S32 CD spectra of 4**

# 1. UV, HRESI-MS, $^1\text{H}$ NMR, $^{13}\text{C}$ NMR, HSQC, HMBC, NOESY and CD spectra of 1

## Figure S1 UV spectra of 1

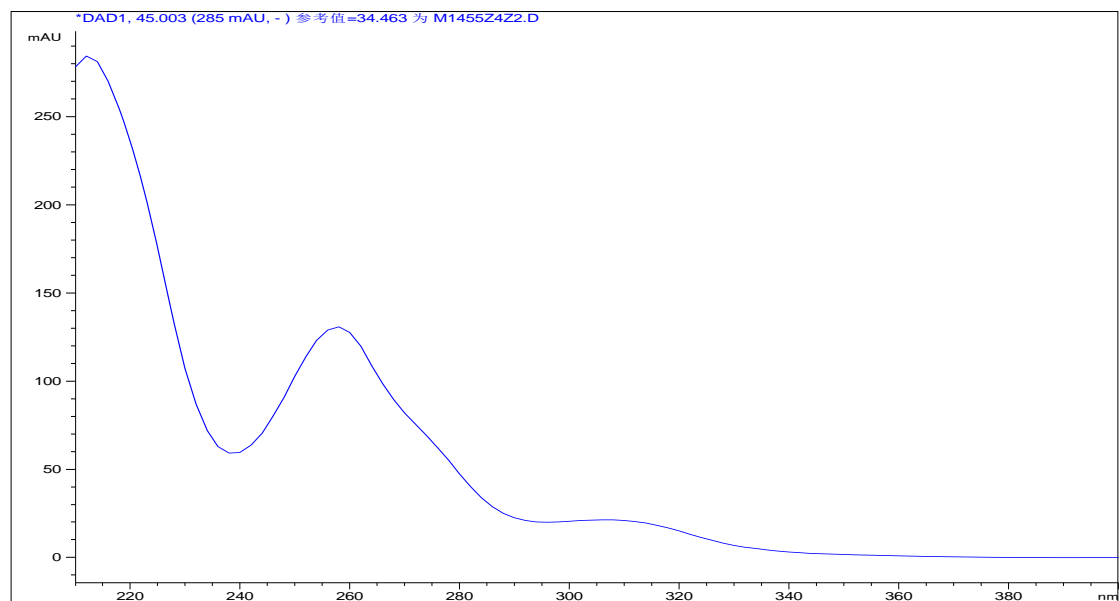

## Figure S2 HRESIMS spectra of 1

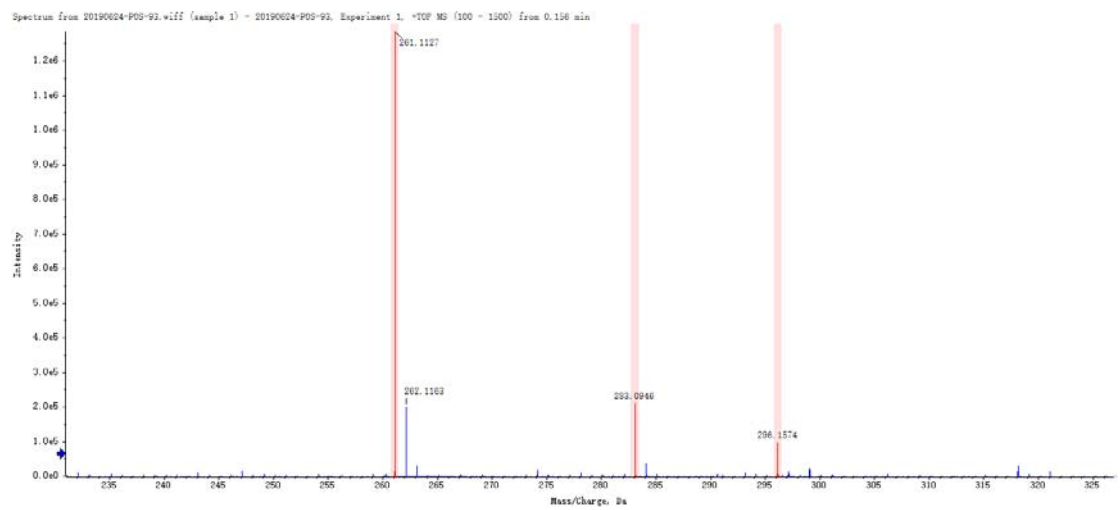

Figure S3  $^1\text{H}$  NMR spectra of 1

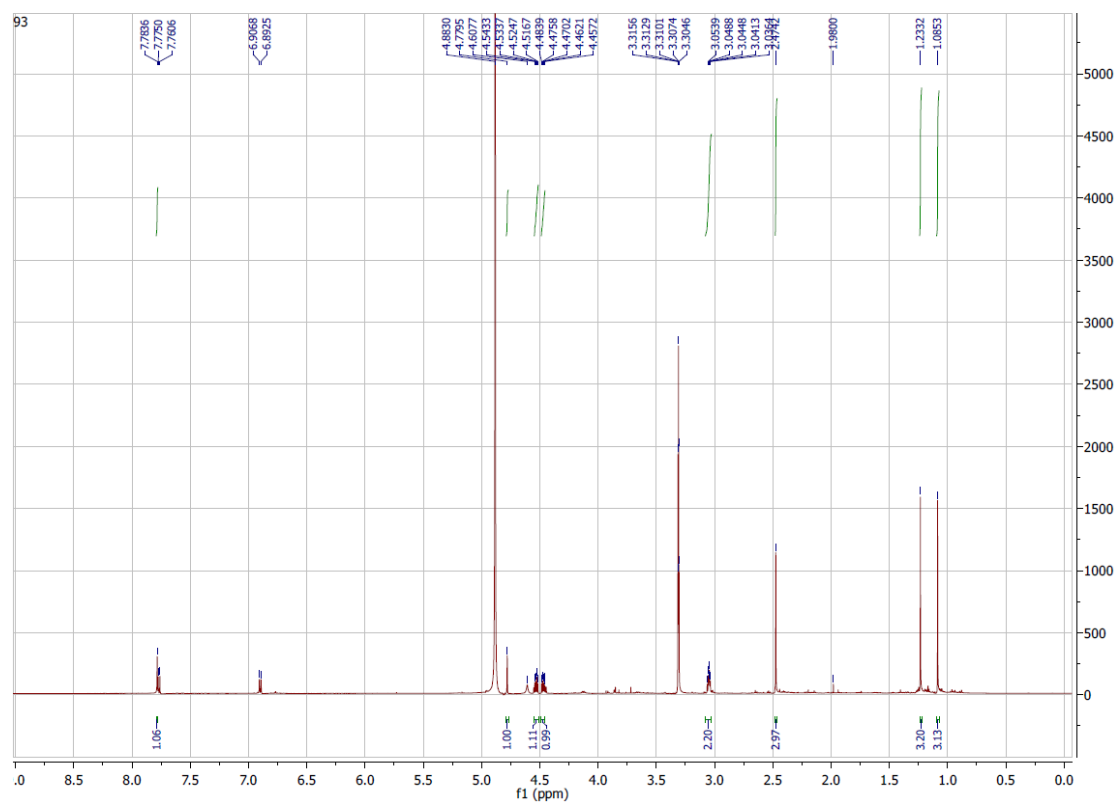

Figure S4  $^{13}\text{C}$  NMR spectra of 1

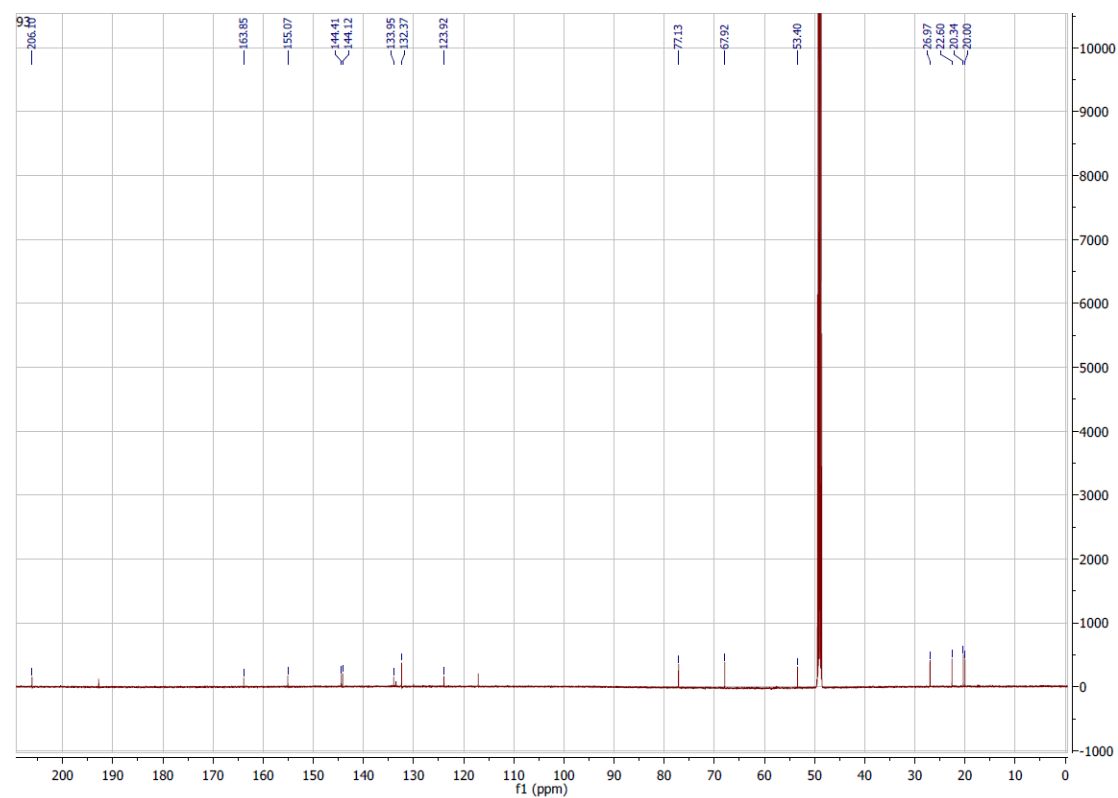

Figure S5 HSQC spectra of **1**

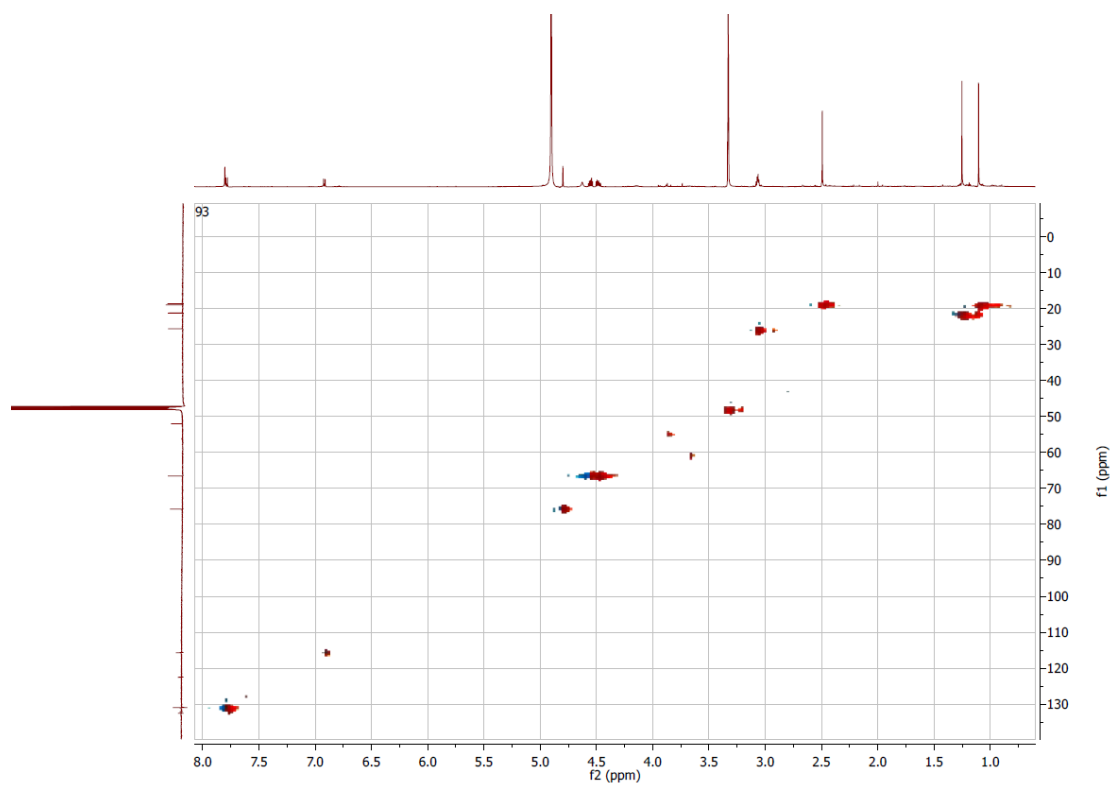

Figure S6 HMBC spectra of **1**

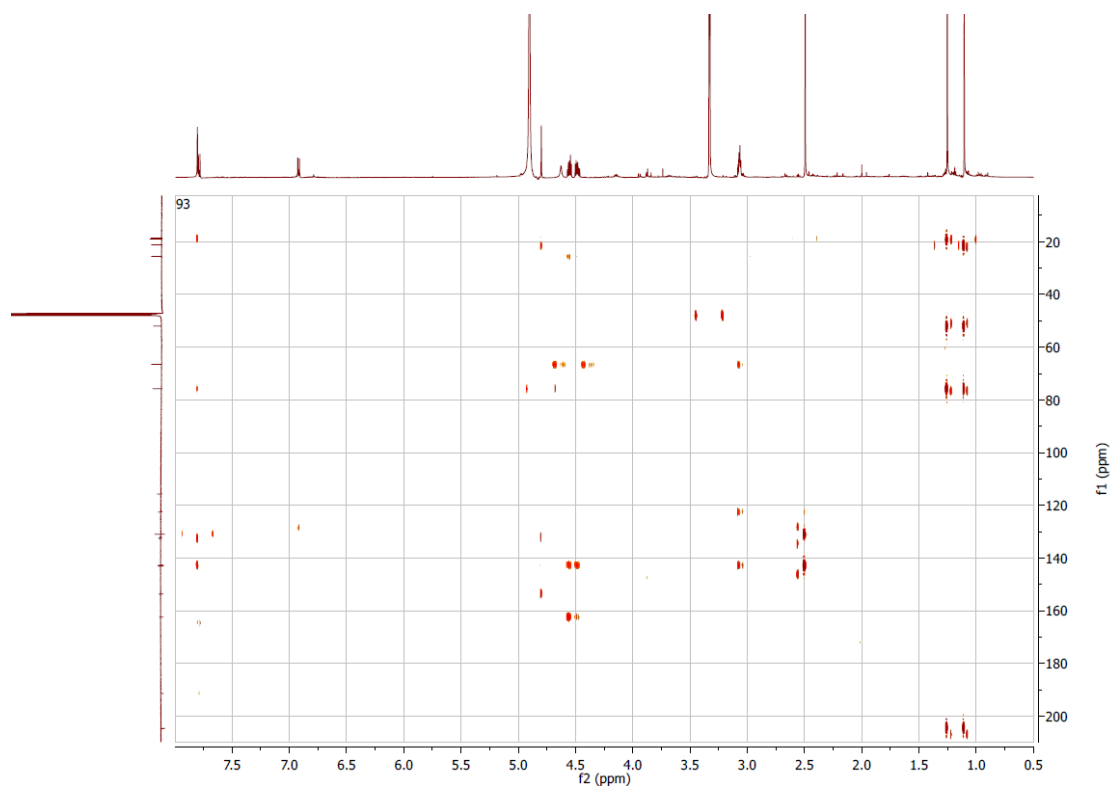

Figure S7 H-H NOESY spectra of 1

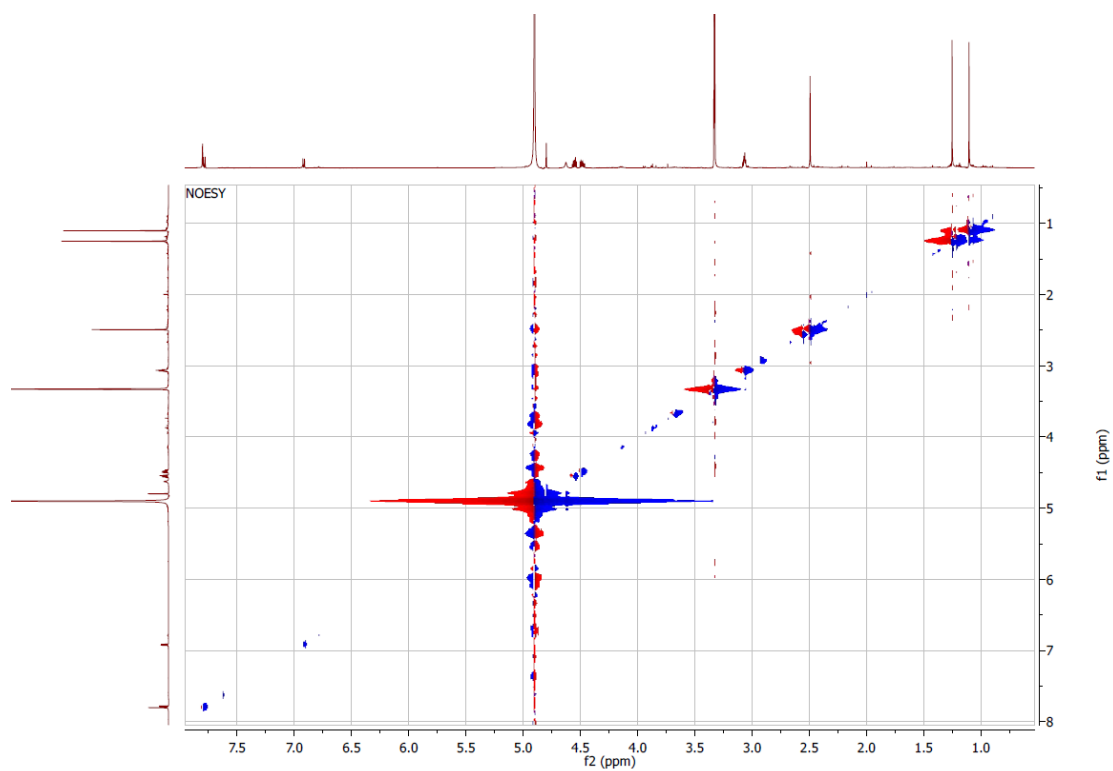

Figure S8 CD spectra of 1

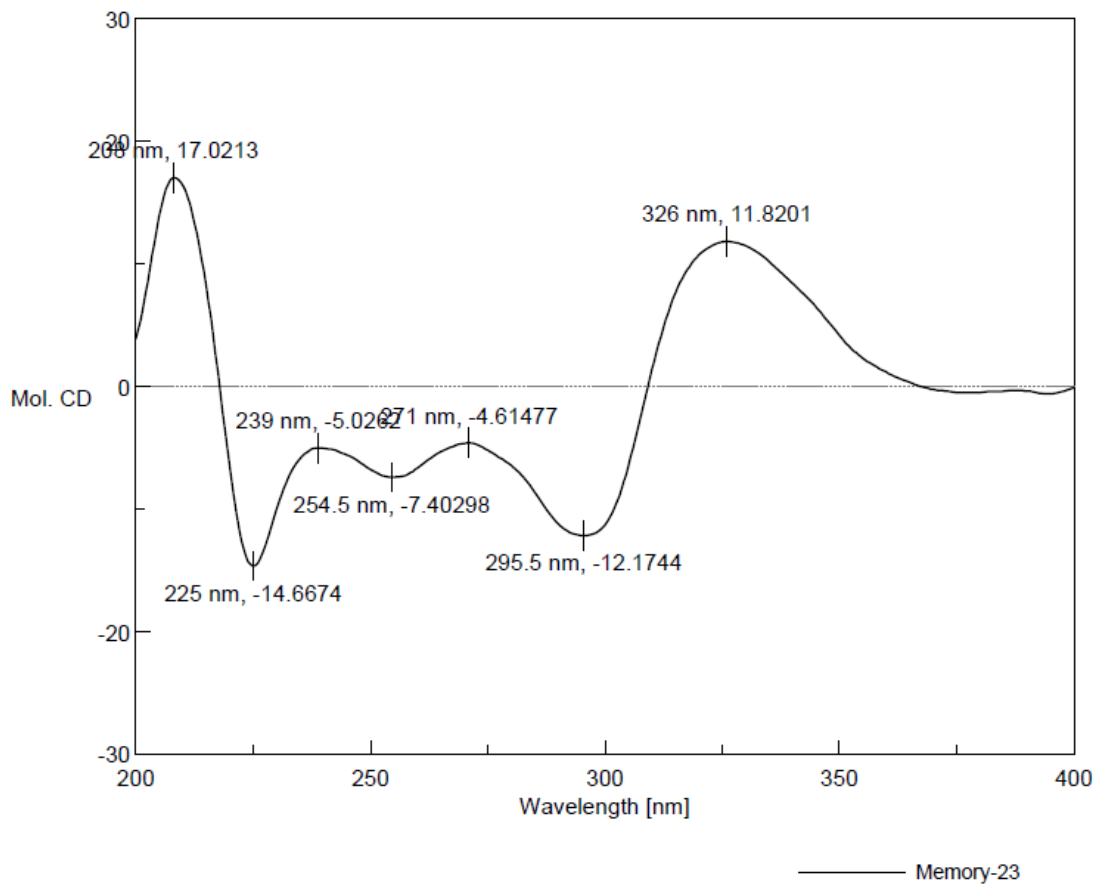

## 2. UV, HRESI-MS, $^1\text{H}$ NMR, $^{13}\text{C}$ NMR, HSQC, HMBC, NOESY and CD spectra of 2

Figure S9 UV spectra of 2

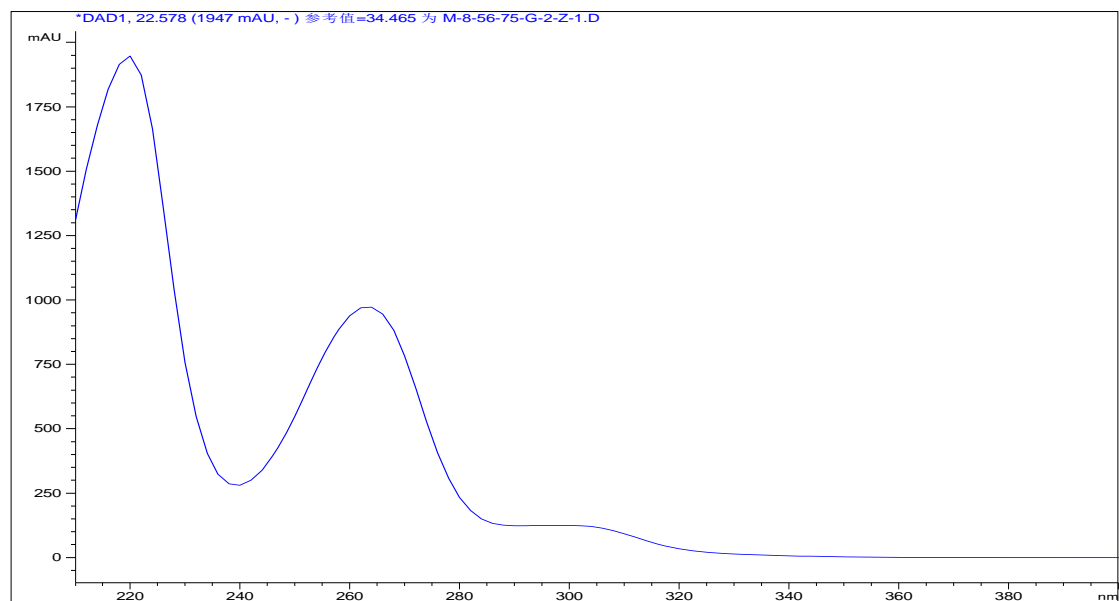

Figure S10 HRESIMS spectra of 2

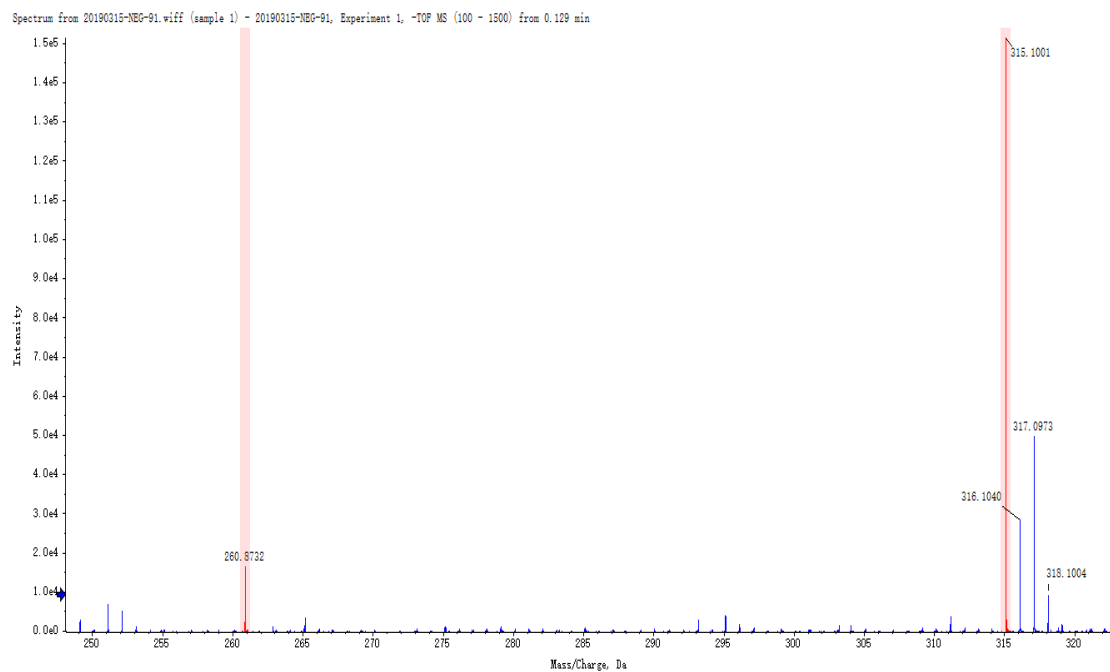

Figure S11  $^1\text{H}$  NMR spectra of 2

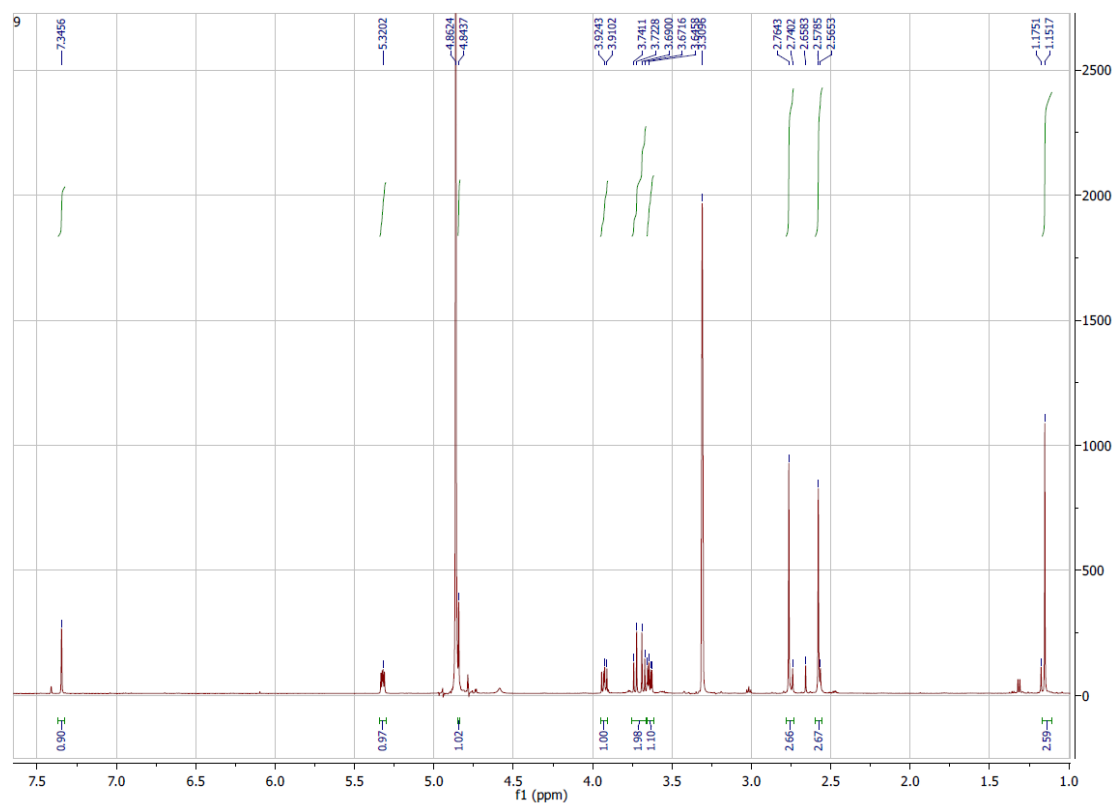

Figure S12  $^{13}\text{C}$  NMR spectra of 2

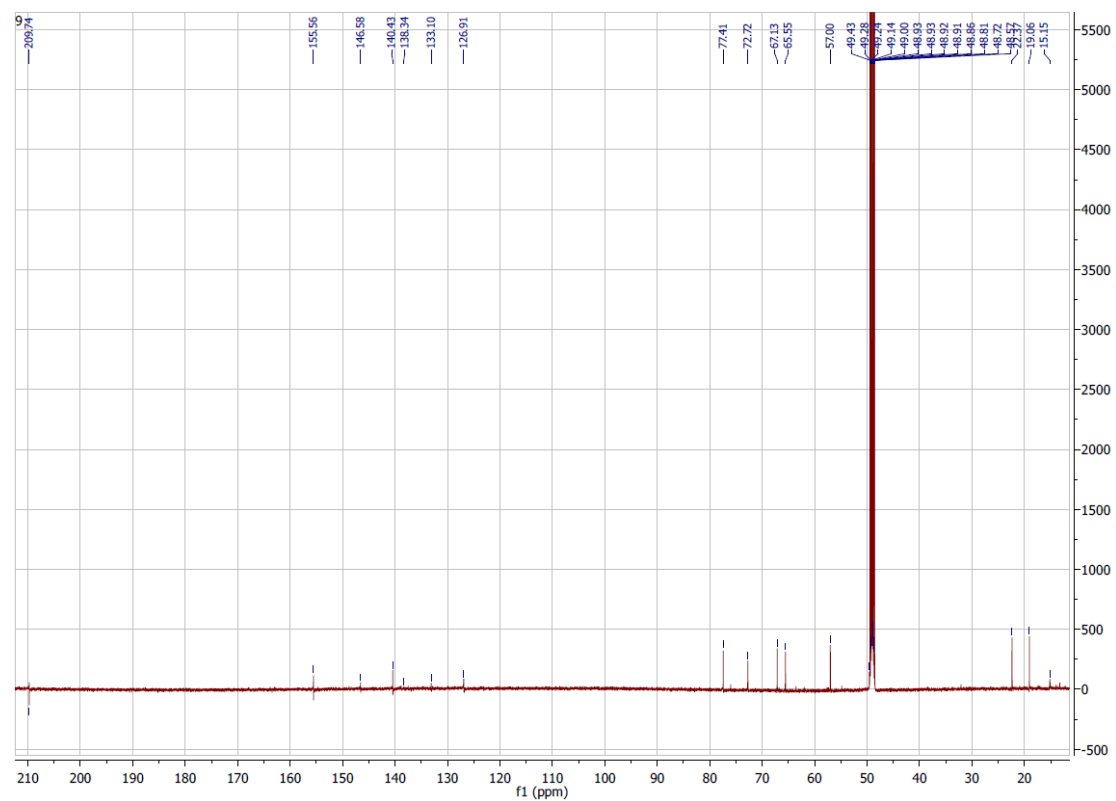



Figure S13 HSQC spectra of 2

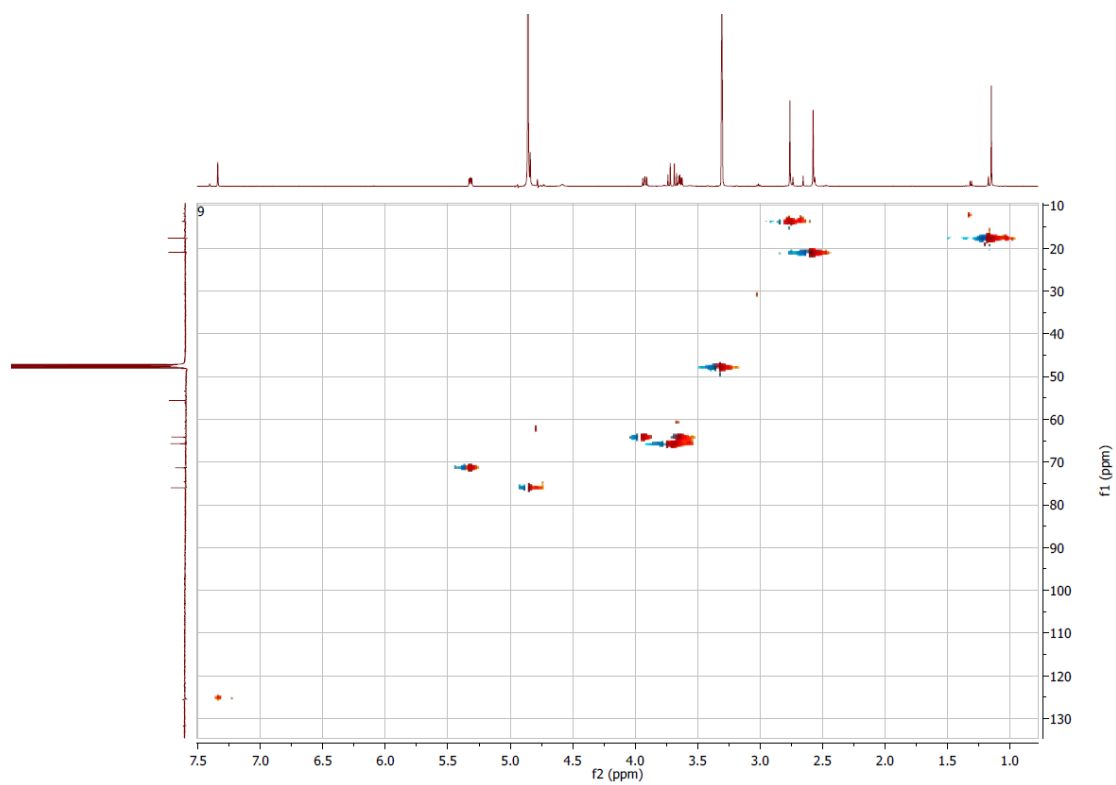

Figure S14 HMBC spectra of 2

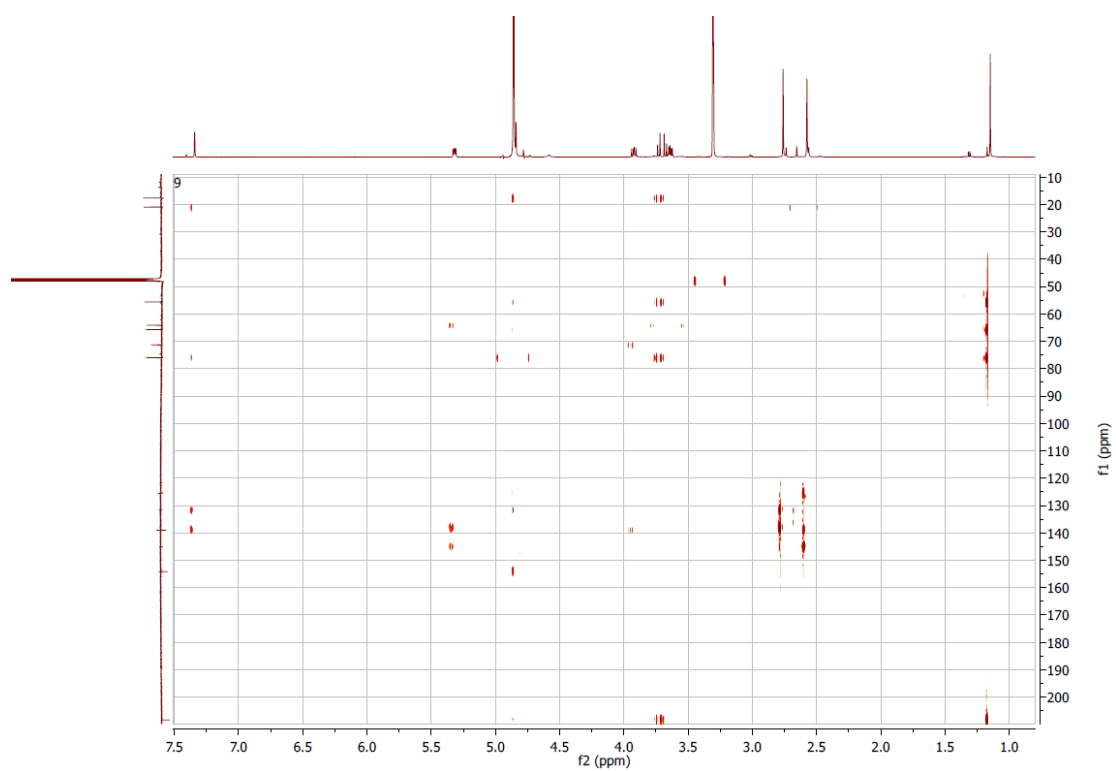

Figure S15 H-H NOESY spectra of 2

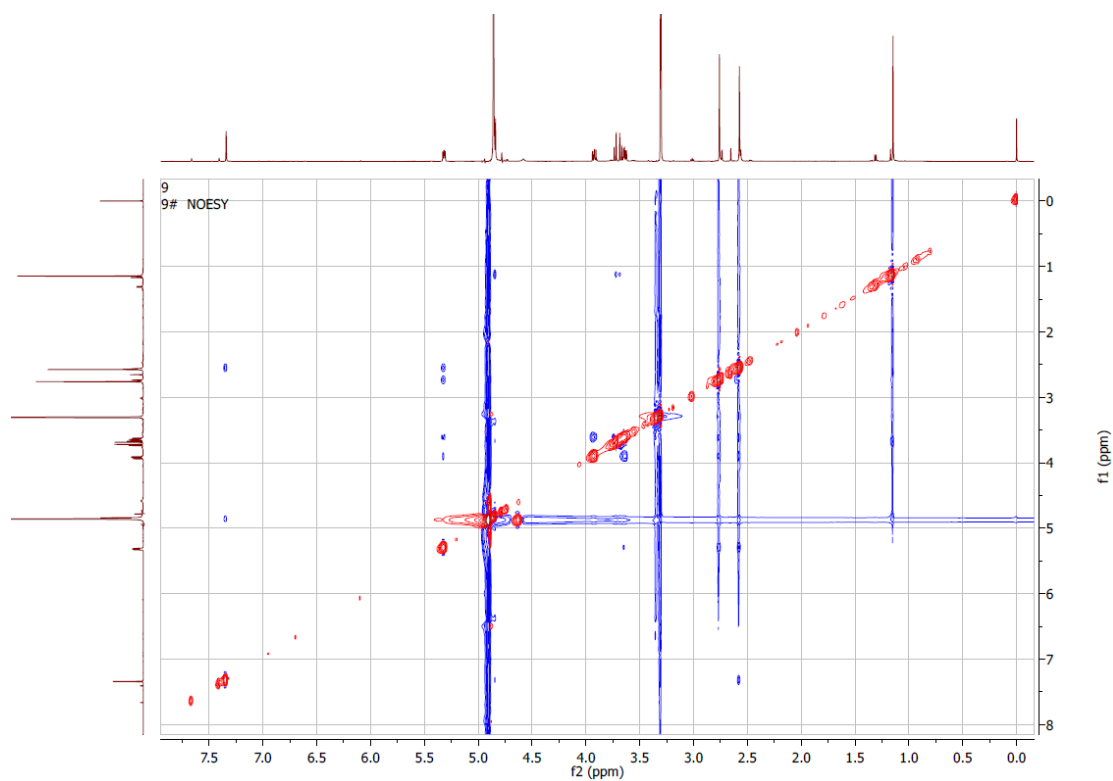

Figure S16 CD spectra of 2

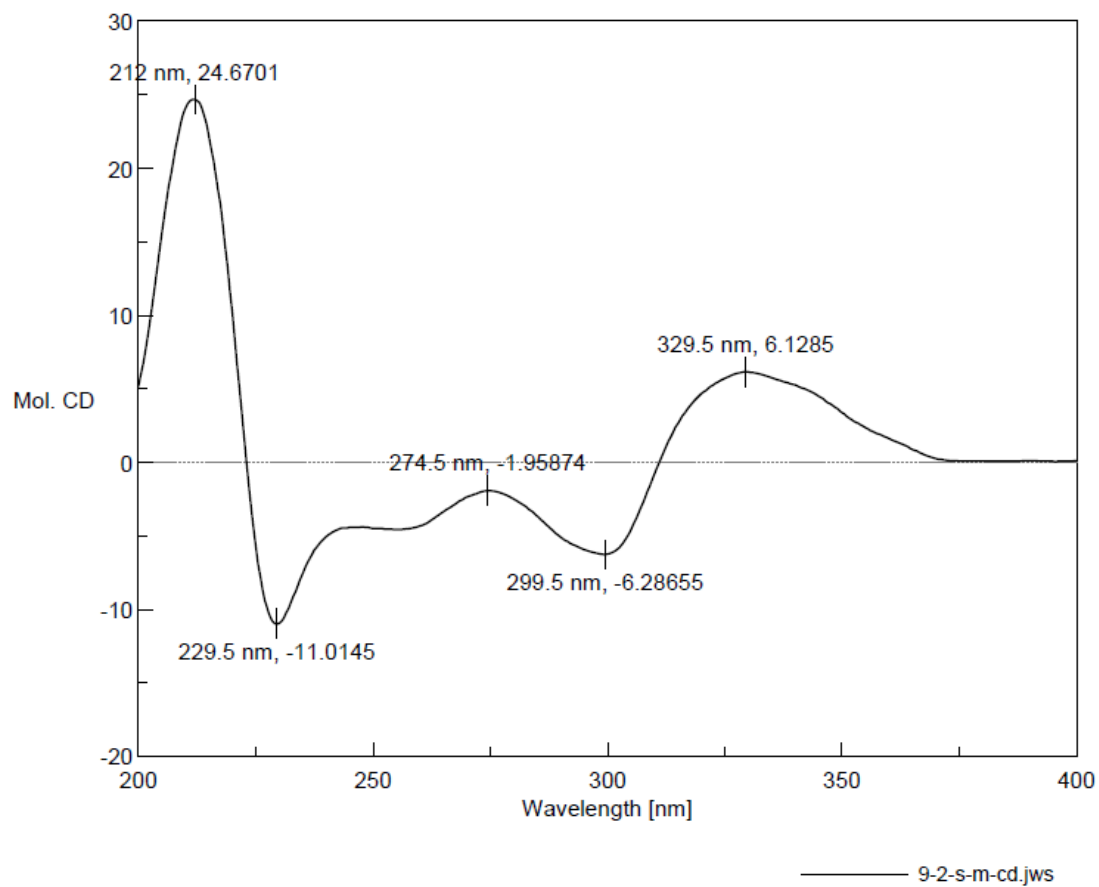

### 3. UV, HRESI-MS, $^1\text{H}$ NMR, $^{13}\text{C}$ NMR, HSQC, HMBC, NOESY and CD spectra of 3

Figure S17 UV spectra of 3

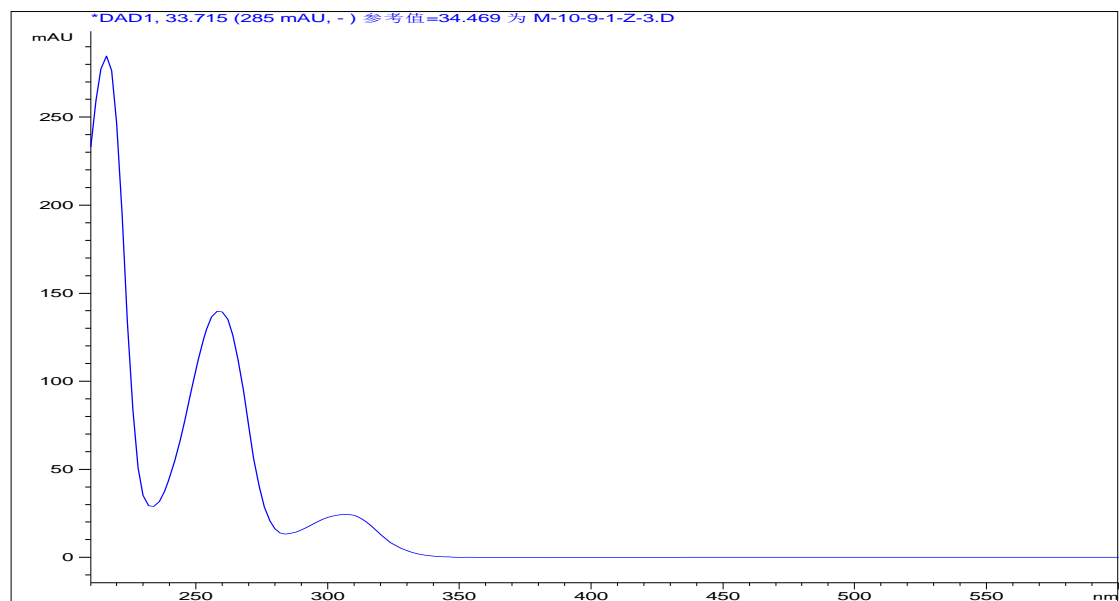

Figure S18 HRESIMS spectra of 3

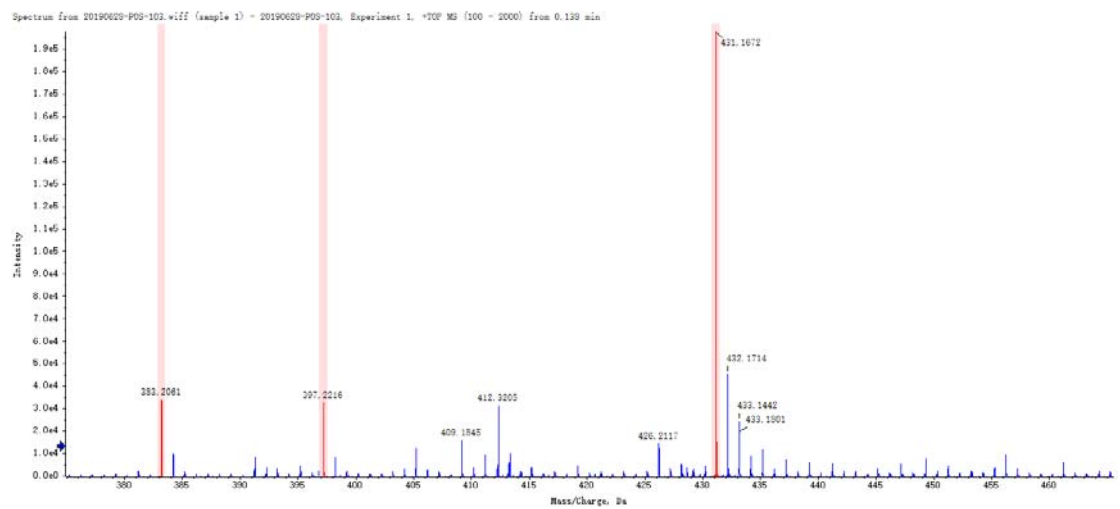

Figure S19  $^1\text{H}$  NMR spectra of 3

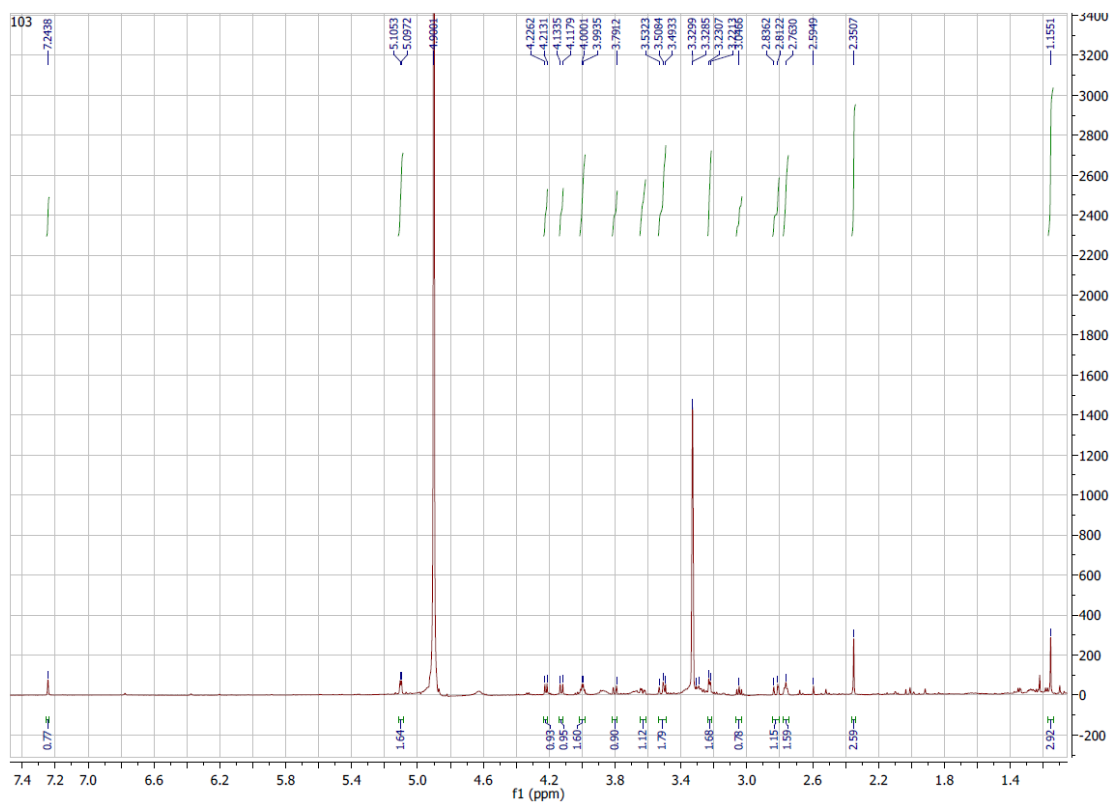

Figure S20  $^{13}\text{C}$  NMR spectra of 3

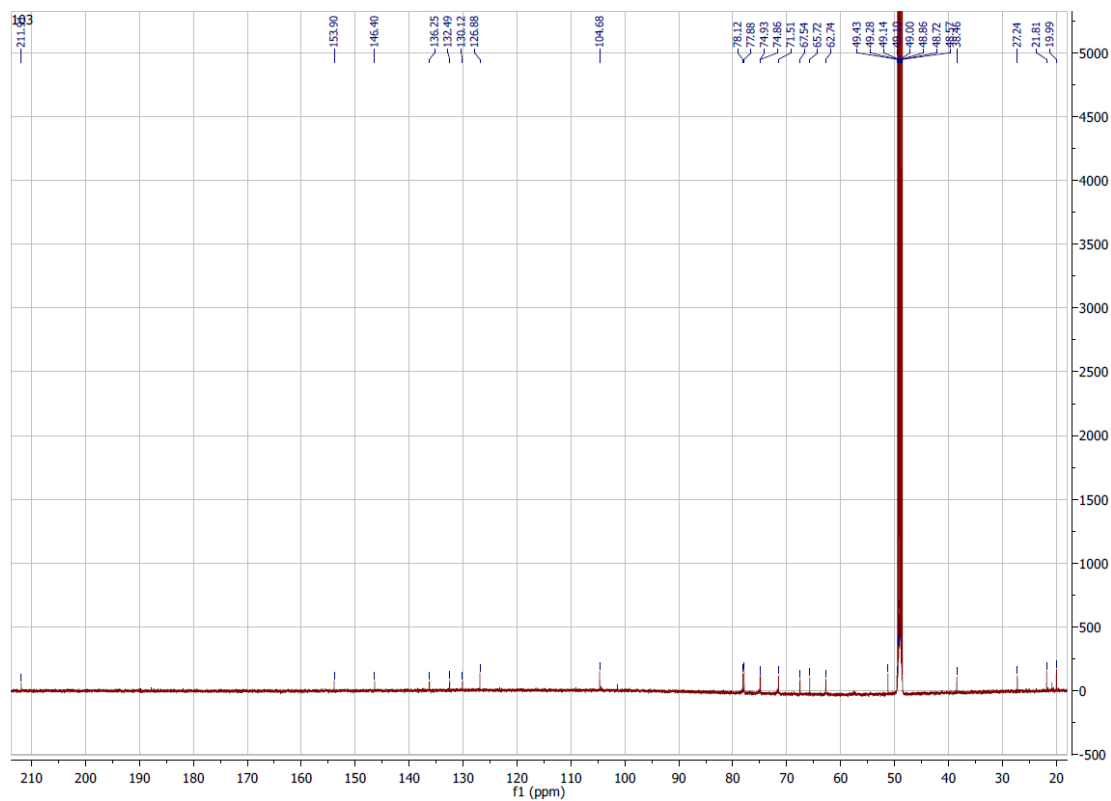

Figure S21 HSQC spectra of 3

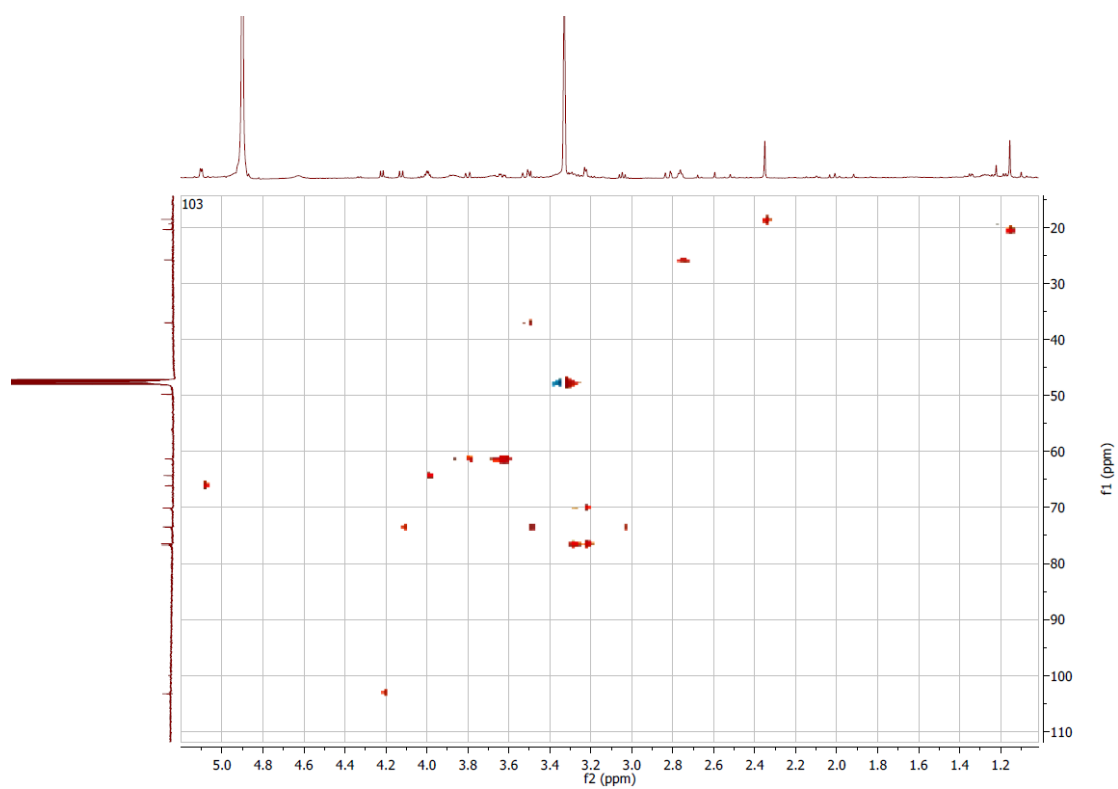

Figure S22 HMBC spectra of 3

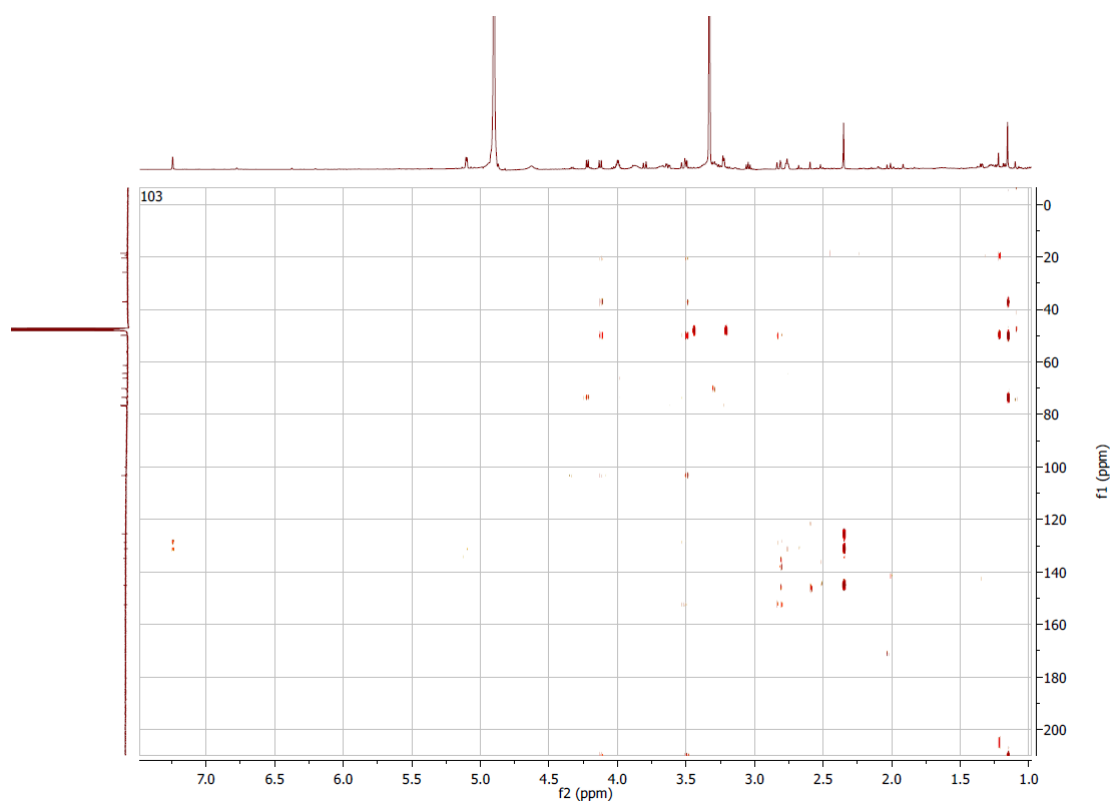

Figure S23 H-H NOESY spectra of 3

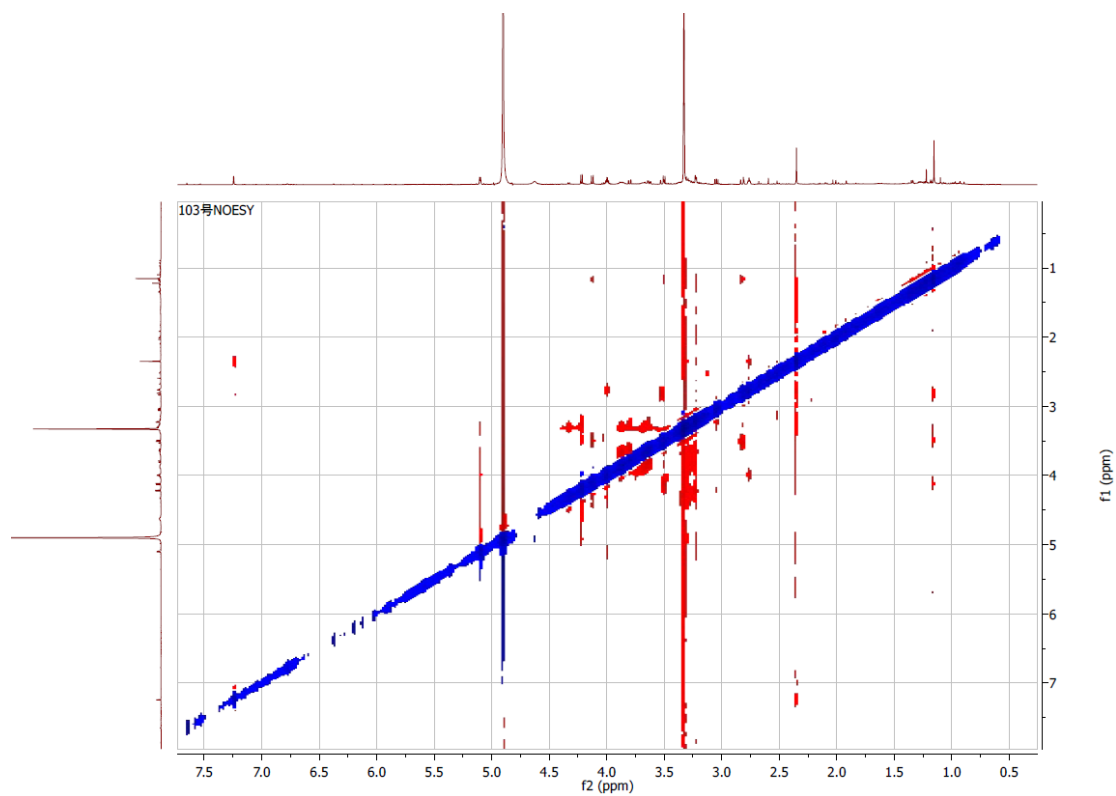

Figure S24 CD spectra of 3

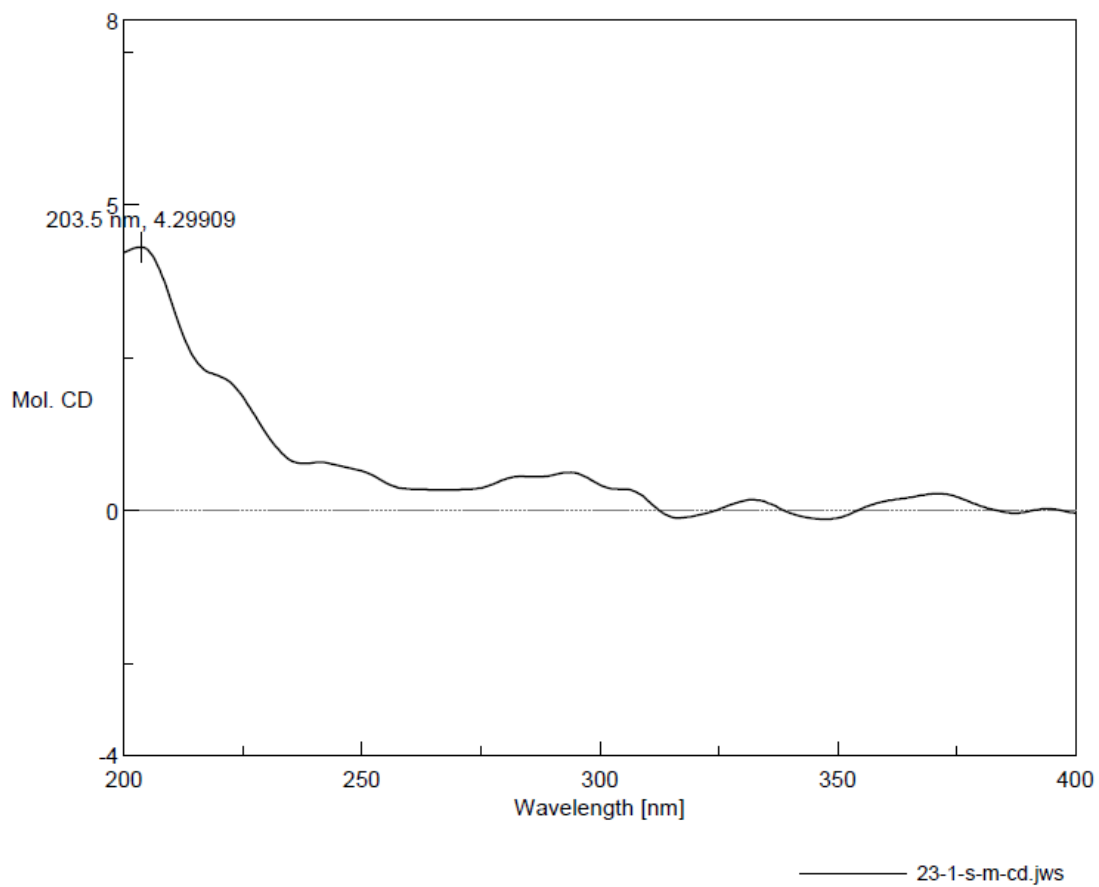

#### 4. UV, HRESI-MS, $^1\text{H}$ NMR, $^{13}\text{C}$ NMR, HSQC, HMBC, NOESY and CD spectra of 4

Figure S25 UV spectra of 4

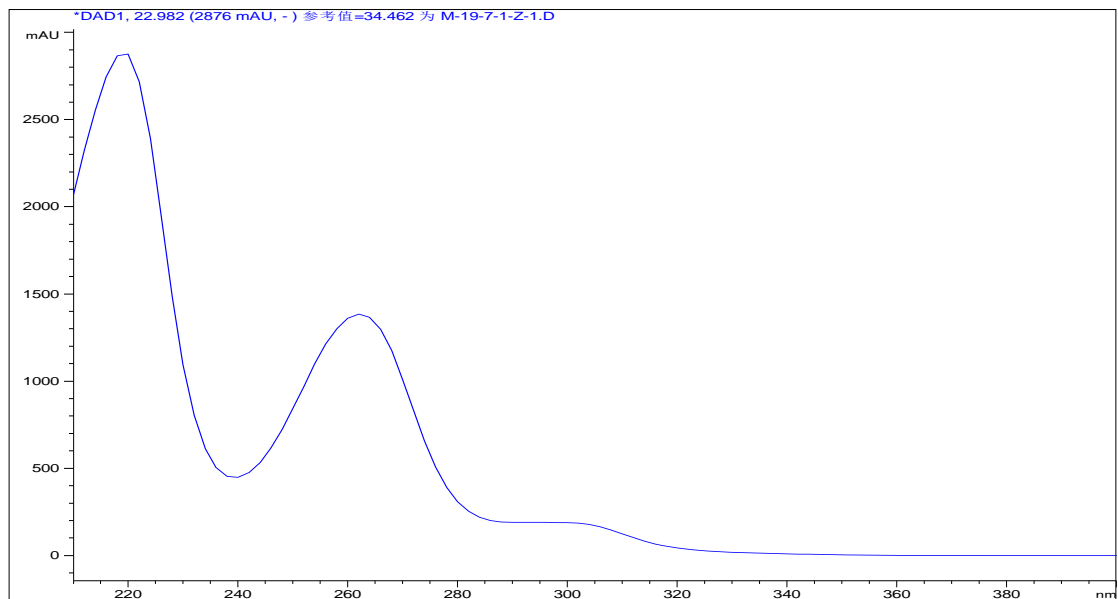

Figure S26 HRESIMS spectra of 4

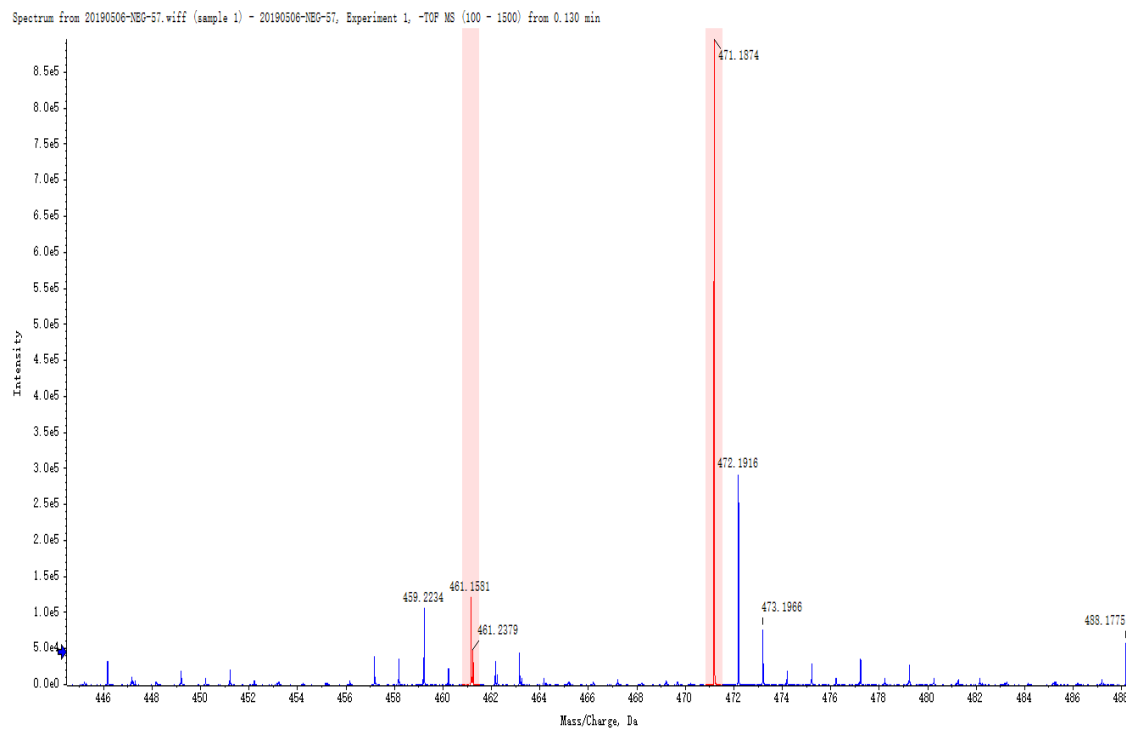

Figure S27  $^1\text{H}$  NMR spectra of 4

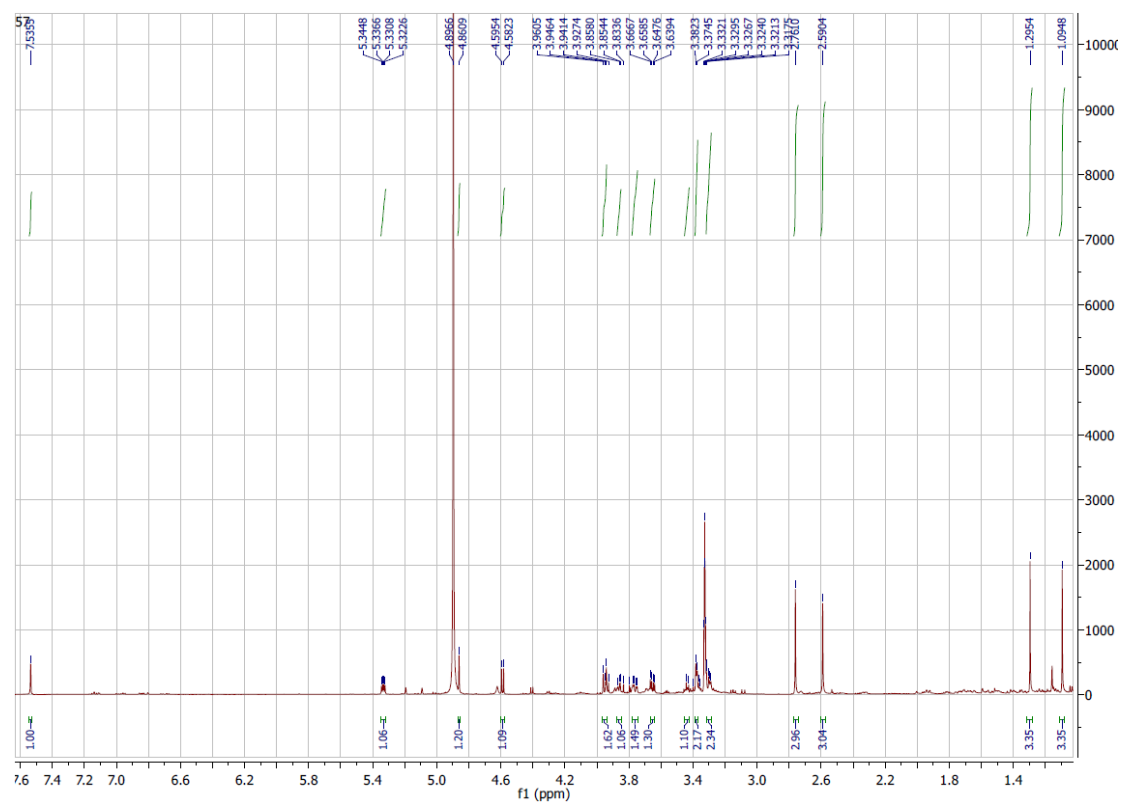

Figure S28  $^{13}\text{C}$  NMR spectra of 4

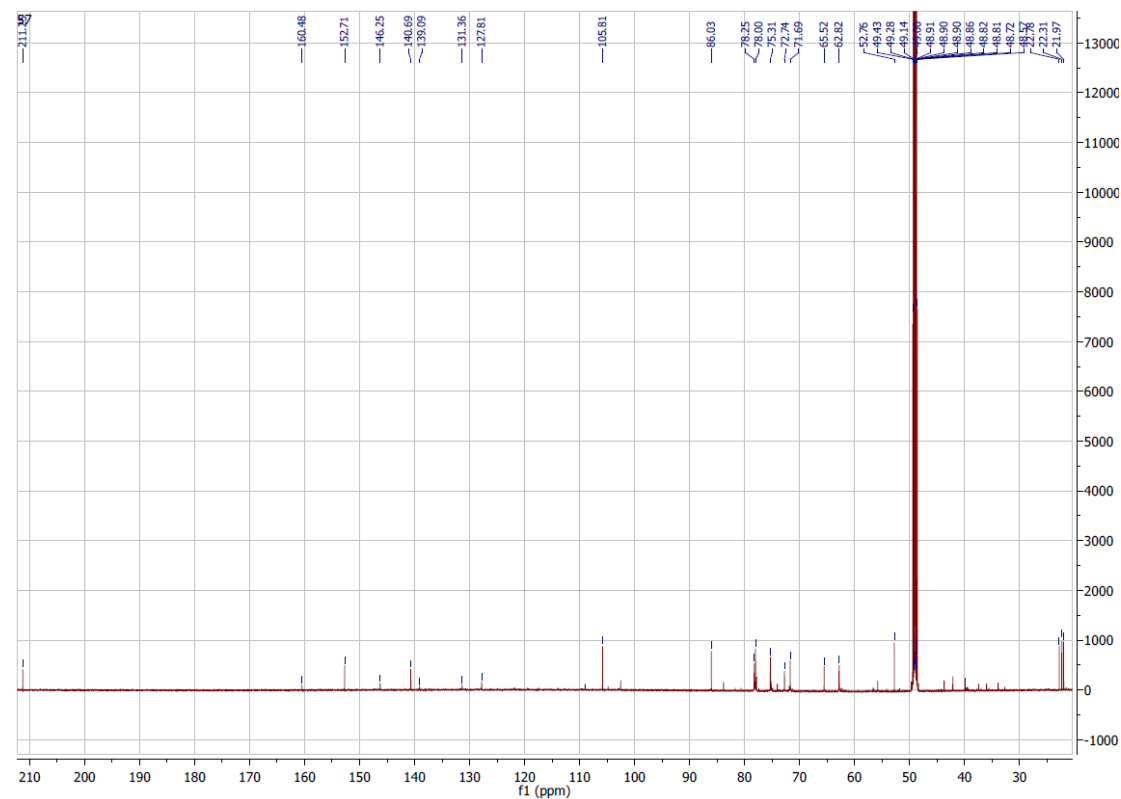



Figure S29 HSQC spectra of 4

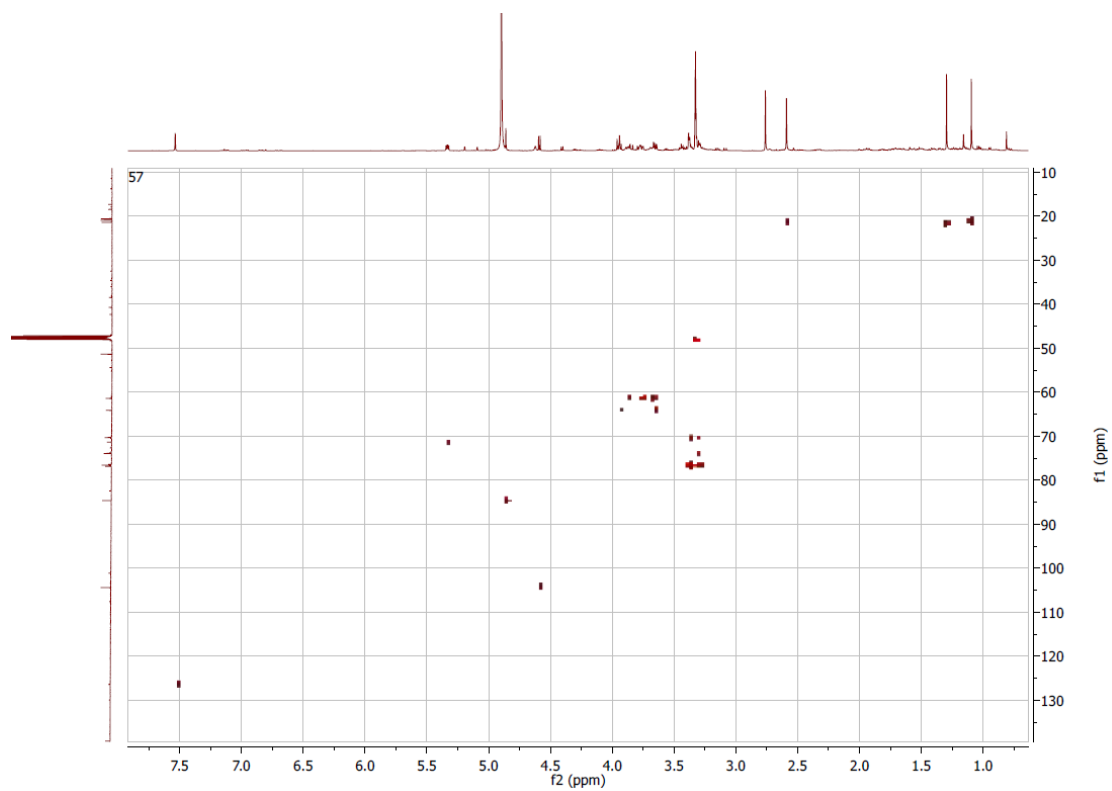

Figure S30 HMBC spectra of 4

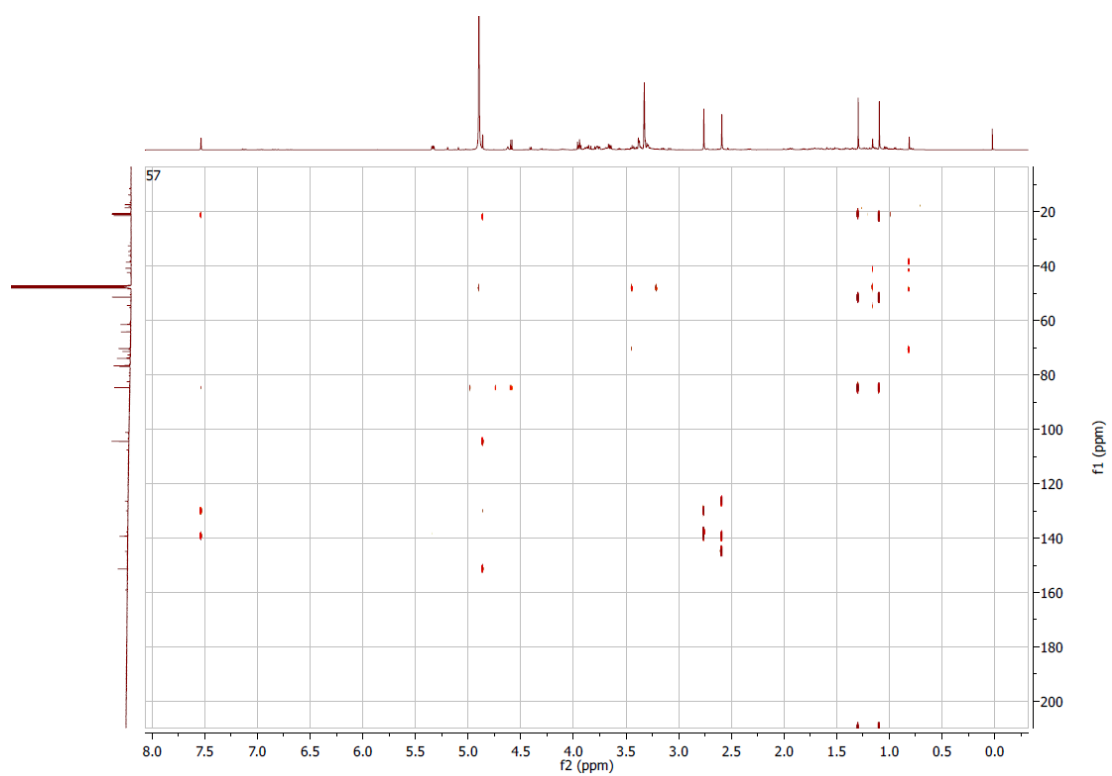

Figure S31 H-H NOESY spectra of 4

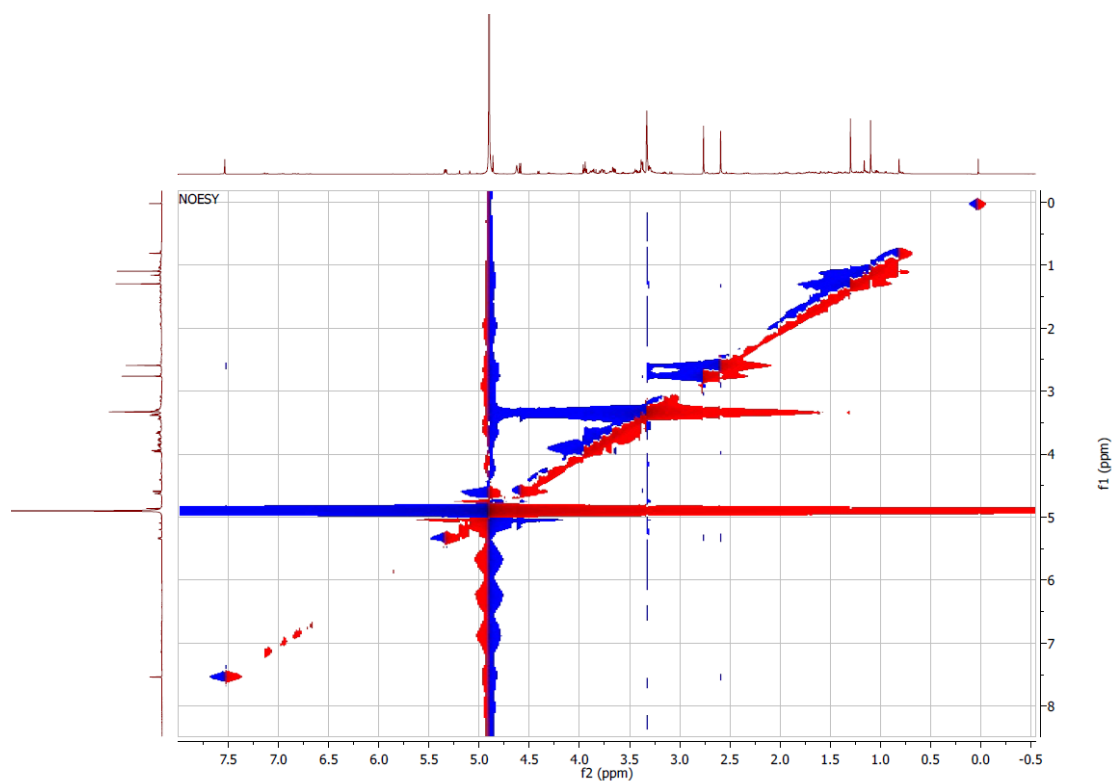

Figure S32 CD spectra of 4

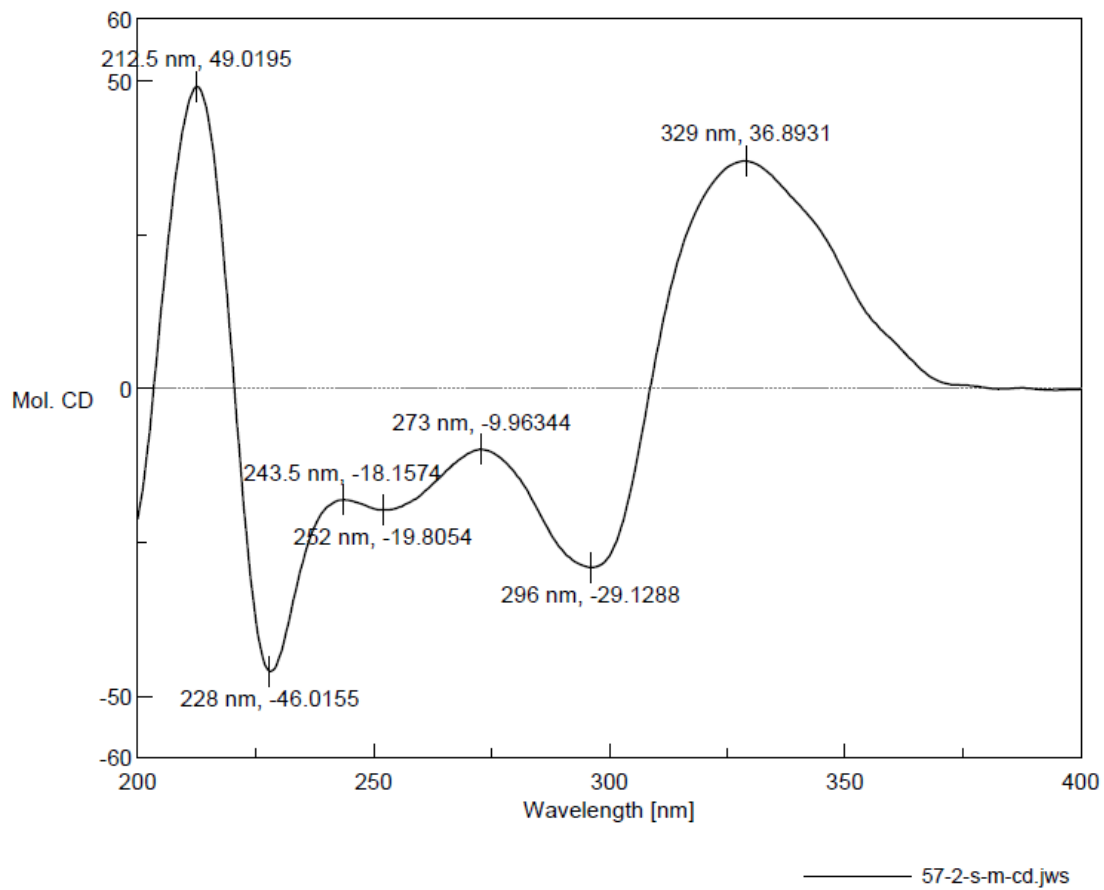

Supplement: molecules-24-02767-s001.pdf [file molecules-24-02767-s001.pdf]
